# Supplementary material for: Activation of the RAS/ PPARα Pathway Reduces Backfat Deposition of Gayal (Bos frontalis)
Source: Research Square preprint supplement (doi:10.21203/rs.3.rs-8373567/v1), 2025-12-26
Supplement: Supplementary file 1 [file 3fff882a936c0ece119c3d4e.xlsx]

## Sheet: Sheet1
Sample	Raw reads	Raw bases	Clean reads	Clean bases	Error rate(%)	Q20(%)	Q30(%)	GC content(%)	Total mapped	Multiple mapped	Uniquely mapped
Gayal_1	44031750	6648794250	43619580	6540946207	0.0132	98.01	93.98	47.51	0.9018	0.0278	0.8741
Gayal_2	46743682	7058295982	46349442	6953130546	0.013	98.1	94.25	47.26	0.9492	0.0268	0.9224
Gayal_3	49946428	7541910628	49529936	7430168602	0.0131	98.07	94.18	47.23	0.8852	0.0275	0.8577
Gayal_4	49321708	7447577908	48875930	7316941998	0.0131	98.07	94.17	47.48	0.9044	0.0295	0.875
Gayal_5	41514518	6268692218	41139468	6160099605	0.0132	98.03	94.05	47.68	0.9155	0.0285	0.887
Gayal_6	48113202	7265093502	47667968	7144425159	0.0132	98.04	94.06	47.91	0.9167	0.0312	0.8855
Gayal_7	46038340	6951789340	45629280	6846516798	0.0131	98.06	94.14	47.44	0.9226	0.0287	0.8939
Gayal_8	53863364	8133367964	53429136	8022739459	0.013	98.11	94.28	47.95	0.9222	0.0308	0.8914
Honghe_cattle_1	51483604	7774024204	51044890	7651789270	0.013	98.09	94.26	46.45	0.9621	0.0232	0.939
Honghe_cattle_2	49283394	7441792494	48856688	7327728101	0.0131	98.09	94.24	47.65	0.9619	0.0268	0.9351
Honghe_cattle_3	46360054	7000368154	45957932	6869464838	0.0131	98.09	94.21	47.29	0.9592	0.0259	0.9333
Honghe_cattle_4	45082162	6807406462	44672692	6696233158	0.0131	98.08	94.19	46.8	0.9613	0.0241	0.9372
Honghe_cattle_5	56632768	8551547968	56169802	8414478893	0.0129	98.16	94.41	47	0.9592	0.0269	0.9324
Honghe_cattle_6	48676852	7350204652	48255968	7244036348	0.013	98.1	94.28	47.37	0.9656	0.0257	0.9399
Honghe_cattle_7	50657590	7649296090	50256506	7531714515	0.0131	98.08	94.15	47.96	0.9565	0.0274	0.9291
Honghe_cattle_8	47591092	7186254892	47169942	7054007754	0.013	98.11	94.3	47.99	0.9619	0.03	0.932
