# Supplementary material for: Activation of the RAS/ PPARα Pathway Reduces Backfat Deposition of Gayal (Bos frontalis)
Source: Research Square preprint supplement (doi:10.21203/rs.3.rs-8373567/v1), 2025-12-26
Supplement: Supplementary file 2 [file 604ab626ba782629dd7e7dd0.xlsx]

## Sheet: Sheet1
Gene Name	Gene ID	Size	Sequence F	Sequence R
MMUT	XM_024983375.2	155	F: CCGACCCGTGAGTCAGTT	R: CTGATGCAGAAGTCGTTGCC
ACSS2	XM_025000407.2	196	F: TAACCAGAAGCGTGTGGACC	R: AAGCCAAGCAGGGGGTAATC
SLC27A6	NM_001101169.1	137	F: AATGGAGCACGCAGTGATGT	R: GCTCTCCCGACTGATCCAAT
ACADM	NM_001075235.1	109	F: TCTGGGCCAACCCAAGTTTT	R: TCAGGTACACTGGAACTAAAGG
ACAA1	NM_001034319.2	89	F: TGACATTGGCATGGCTTGTG	R: TCTCCACCAGGCGTGAAGTA
RXRG	NM_001075408.1	115	F: TCCCCAGACGTGATGCTTA	R: TCCCCATCCCCTTAGATAGC
KLK1	XM_059876535	78	F: TAAGCCCTCCGTCTACACCA	R：GCATTCAGGGGTTGTCAGT
CPA3	XM_015473004.3	82	F: CCACAAGAACCTGACCCAAC	R: TCGGAGCTCAAAGGCAAATG
ACE	NM_001206668	91	F: GAACGCCACACACATGTTCC	R: CATGGATTCCGCCCAGAACT
MAS1	XM_059889977	183	F: CTGATCCTTCTCTCCCAATCGT	R: GATGCGATGCTCCAAAGAAGG
β-actin	AY141970.1	155	F: CACACGGTGCCCATCTATGA	R: ATGTCACGGACGATTTCCGC
