# Supplementary material for: Activation of the RAS/ PPARα Pathway Reduces Backfat Deposition of Gayal (Bos frontalis)
Source: Research Square preprint supplement (doi:10.21203/rs.3.rs-8373567/v1), 2025-12-26
Supplement: Supplementary file 3 [file 8ac5f0481b0c80298ad82b69.xlsx]

## Sheet: Sheet1
	Product Code	Manufacturer
Angiotensin I	H664-1-2	Nanjing Jiancheng Bioengineering Institute, China
Angiotensin 1-7	H343-1	Nanjing Jiancheng Bioengineering Institute, China
Angiotensin-converting enzyme (ACE)	H215-1-2	Nanjing Jiancheng Bioengineering Institute, China
Nonesterified free fatty acids (NEFA)	A042-2-1	Nanjing Jiancheng Bioengineering Institute, China
Triglyceride (TG)	A110-1-1	Nanjing Jiancheng Bioengineering Institute, China
Total protein	A045-2	Nanjing Jiancheng Bioengineering Institute, China
